# Supplementary material for: Mechanism of tetrachloroplatinate(ii) oxidation by hydrogen peroxide in hydrochloric acid solution
Source: Royal Society of Chemistry journal article supplement (doi:10.1039/c3dt53057d), 2013-12-20
Supplement: c3dt53057d.pdf [file c3dt53057d.pdf]

## **Oxidation mechanism of tetrachloroplatinate(II) by hydrogen peroxide in hydrochloric acid solution**

Pieter Murray,<sup>a,b</sup> Klaus R. Koch<sup>a\*</sup> and Rudi van Eldik<sup>b\*</sup>

<sup>a</sup> Department of Chemistry and Polymer Science, University of Stellenbosch, Private Bag X1, 7602 Matieland, South Africa \*[krk@sun.ac.za](mailto:krk@sun.ac.za)

<sup>b</sup> Department of Chemistry and Pharmacy, University of Erlangen-Nürnberg, Egerlandstr. 1, 91058 Erlangen, Germany. \*[rudi.vaneldik@chemie.uni-erlangen.de](mailto:rudi.vaneldik@chemie.uni-erlangen.de)

## Electronic Supplementary Information (ESI)

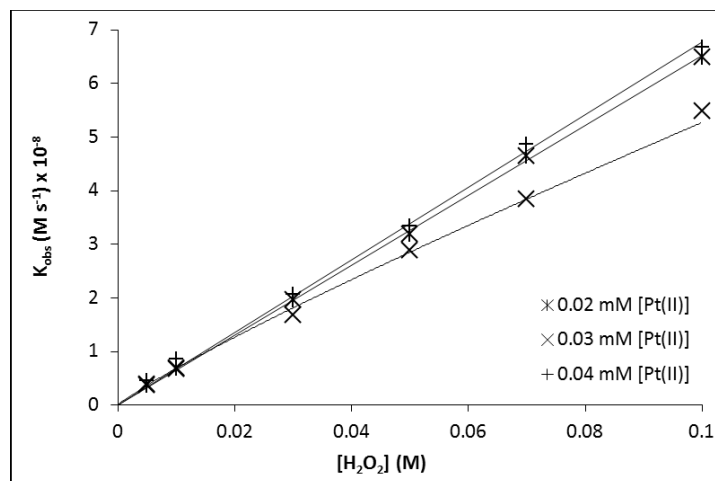

**Figure S1A.** Dependence of  $k_{\text{obs}}^0$  on the concentration of  $\text{H}_2\text{O}_2$  for the oxidation of 0.02, 0.03 and 0.04 mM  $[\text{PtCl}_4]^{2-}$ .

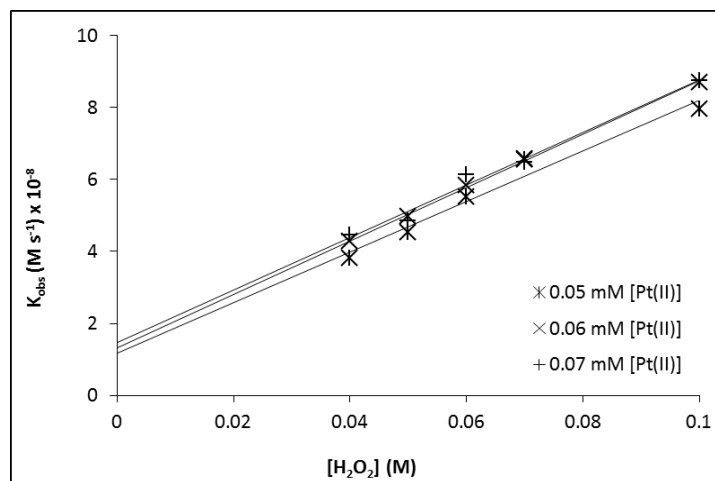

**Figure S1B.** Dependence of  $k_{\text{obs}}^0$  on the concentration of  $\text{H}_2\text{O}_2$  for the oxidation of 0.05, 0.06 and 0.07 mM  $[\text{PtCl}_4]^{2-}$ .

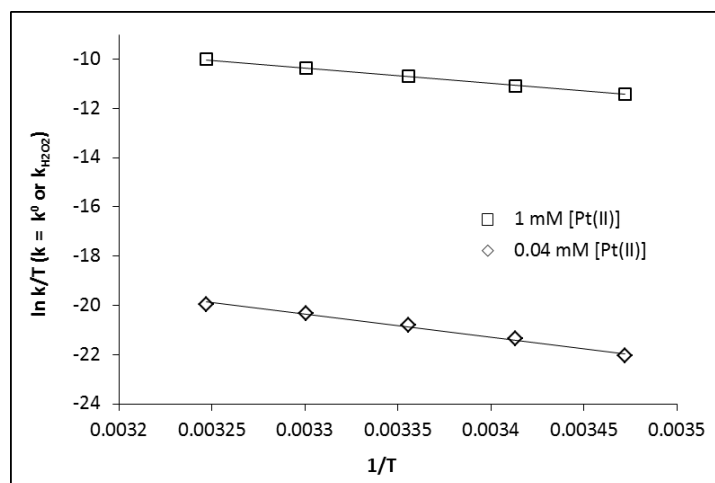

**Figure S2.** Eyring plots for the oxidation of 0.04 mM  $[\text{PtCl}_4]^{2-}$  by 100 mM  $\text{H}_2\text{O}_2$ , and of 1 mM  $[\text{PtCl}_4]^{2-}$  by 300 mM  $\text{H}_2\text{O}_2$ .

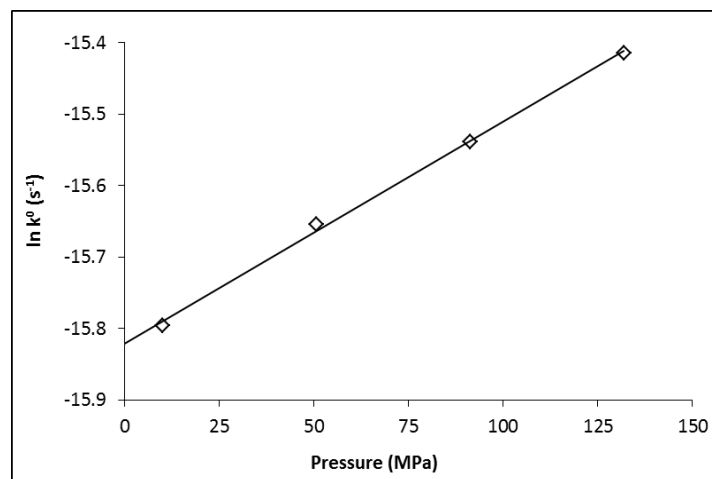

**Figure S3.** Plot of  $\ln k^0$  ( $\text{s}^{-1}$ ) as a function of pressure to calculate the activation volume for the zero-order mechanism.

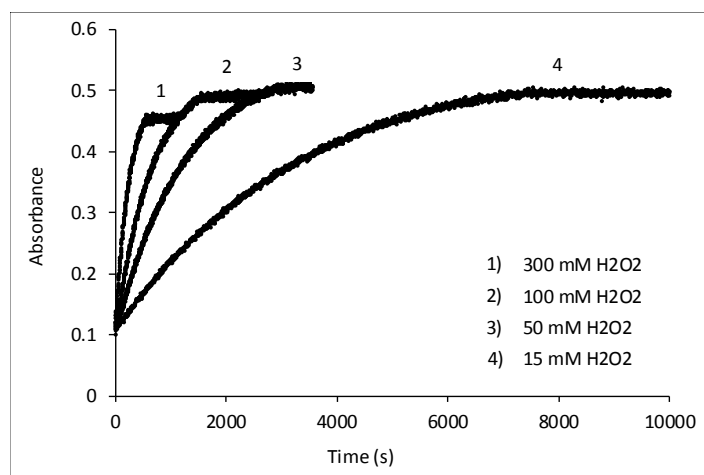

**Figure S4.** Absorbance vs. time plots at 353 nm and 35 °C for the oxidation of 1 mM  $[\text{PtCl}_4]^{2-}$  by various concentrations of  $\text{H}_2\text{O}_2$ ,  $[\text{H}^+]$ ,  $[\text{Cl}^-] = 1 \text{ M}$ .

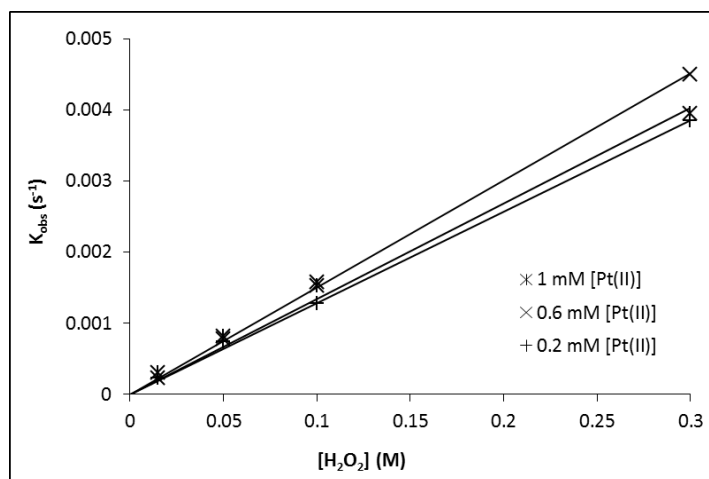

**Figure S5.** The dependence of  $k_{\text{obs}}$  on the  $\text{H}_2\text{O}_2$  concentration for oxidation of 1, 0.6, and 0.2 mM  $[\text{PtCl}_4]^{2-}$ .

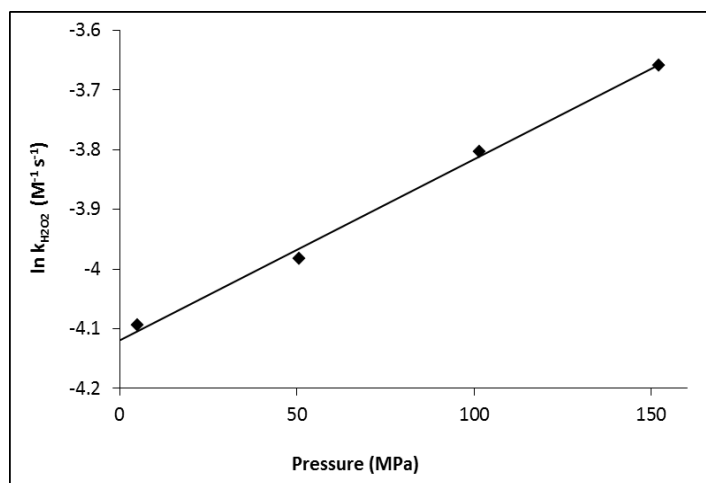

**Figure S6.** Plot of  $\ln k_{\text{H}_2\text{O}_2}$  as a function of pressure (MPa) to calculate the activation volume for the pseudo-first order mechanism.

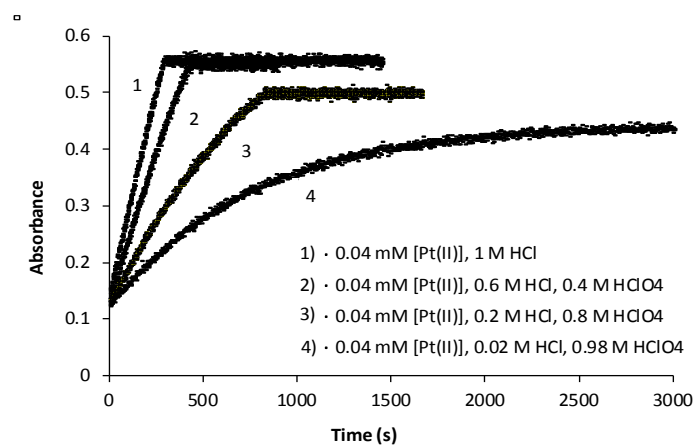

**Figure S7.** Absorbance vs. time plots at 353 nm and 35 °C for the oxidation of 0.04 mM  $[\text{PtCl}_4]^{2-}$  as a function of chloride concentration. Concentrations of  $[\text{PtCl}_4]^{2-}$  was kept constant at 0.04 mM,  $[\text{H}_2\text{O}_2]$  at 80 mM and ionic strength 1 M.

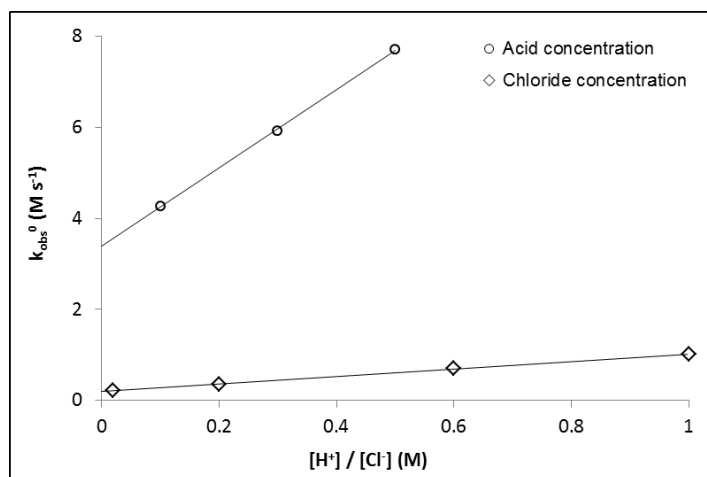

**Figure S8.** Plots of  $k_{\text{obs}}^0$  ( $\text{M s}^{-1}$ ) as a function of acid and chloride concentration.  $[\text{PtCl}_4]^{2-} = 0.04$  mM;  $[\text{H}_2\text{O}_2] = 80$  mM and ionic strength = 1 M.
